# Supplementary material for: O-Vanillin Attenuates the TLR2 Mediated Tumor-Promoting Phenotype of Microglia
Source: MDPI journal article supplement (doi:10.3390/ijms21082959), 2020-04-22
Supplement: s1 [file s1]

Human CD11B pos. Cells

Confirmed GBM

500 000 MACS sorted cells per well

Ctrl Group vs 100µM O-Vanillin

Overnight treatment

Tumor

OP20012017

OP25012017

| Sample        | Target | CT Mean        | GAPDH CT     | Difference  | Corrected  | Fold Change |
|---------------|--------|----------------|--------------|-------------|------------|-------------|
| OP250117Ctrl1 | MMP14  | 33.31617737    | 28.7523861   | 0.04691633  | 33.269261  | 1           |
| OP250117Ctrl2 | MMP14  | 33.26809692    | 29.1502399   | 0.44477018  | 32.8233267 | 1           |
| OP250117OV1   | MMP14  | 33.33500671    | 28.6831036   | -0.02236621 | 33.3573729 | 0.7341566   |
| OP250117OV2   | MMP14  | 34.2047081     | 28.8599758   | 0.15450605  | 34.0502021 | 0.4272418   |
| OP200117Ctrl  | MMP14  | 34.63786697    | 29.7565556   | 0.34374428  | 34.2941227 | 1           |
| OP200117OV    | MMP14  | 34.2454567     | 29.069067    | -0.34374428 | 34.589201  | 0.81502811  |
| H2O           | MMP14  |                | Undetermined |             |            |             |
|               |        | Average 200117 | 28.7054698   |             |            |             |
|               |        | Average250117  | 29.4128113   |             |            |             |

| Sample        | Target | CT Mean        | GAPDH CT     | Difference  | Corrected  | Fold Change |
|---------------|--------|----------------|--------------|-------------|------------|-------------|
| OP250117Ctrl1 | MMP9   | 25.60007286    | 28.7523861   | 0.04691633  | 25.5531565 | 1           |
| OP250117Ctrl2 | MMP9   | 25.75378036    | 29.1502399   | 0.44477018  | 25.3090102 | 1           |
| OP250117OV1   | MMP9   | 26.15553856    | 28.6831036   | -0.02236621 | 26.1779048 | 0.64853295  |
| OP250117OV2   | MMP9   | 27.18517685    | 28.8599758   | 0.15450605  | 27.0306708 | 0.30319952  |
| OP200117Ctrl  | MMP9   | 29.5340271     | 29.7565556   | 0.34374428  | 29.1902828 | 1           |
| OP200117OV    | MMP9   | 29.95483208    | 29.069067    | -0.34374428 | 30.2985764 | 0.46384235  |
| H2O           | MMP9   |                | Undetermined |             |            |             |
|               |        | Average 200117 | 28.7054698   |             |            |             |
|               |        | Average250117  | 29.4128113   |             |            |             |

Tumor

OP07032017

| Sample | Target | CT          | GAPDH CT   | Difference  | Corrected  | Fold Change |
|--------|--------|-------------|------------|-------------|------------|-------------|
| Ctrl1  | MMP14  | 23.34068108 | 20.3786182 | 0.40108824  | 22.9395928 | 1           |
| Ctrl2  | MMP14  | 23.21336746 | 19.8087578 | -0.16877222 | 23.3821397 | 1           |
| OV1    | MMP14  | 23.25008392 | 20.0320873 | 0.05455732  | 23.1955266 | 0.83744494  |
| OV2    | MMP14  | 23.11669731 | 19.6906567 | -0.28687334 | 23.4035707 | 0.98525497  |
|        |        | Average     | 19.97753   |             |            |             |

| Sample  | Target | CT          | GAPDH CT   | Difference  | Corrected  | Fold Change |
|---------|--------|-------------|------------|-------------|------------|-------------|
| Ctrl1   | MMP9   | 17.92854118 | 20.3786182 | 0.40108824  | 17.5274529 | 1           |
| Ctrl2   | MMP9   | 17.50784302 | 19.8087578 | -0.16877222 | 17.6766152 | 1           |
| OV1     | MMP9   | 18.5588398  | 20.0320873 | 0.05455732  | 18.5042825 | 0.50809511  |
| OV2     | MMP9   | 17.16085434 | 19.6906567 | -0.28687334 | 17.4477277 | 1.17193094  |
| Average |        |             | 19.97753   |             |            |             |

Tumor

OP28022017 (average of duplicates)

| Sample   | Target | Mean CT     | GAPDH CT   | Difference  | Corrected  | Fold Change |
|----------|--------|-------------|------------|-------------|------------|-------------|
| Ctrl     | MMP14  | 22.69521713 | 24.9339294 | 0.08513641  | 22.6100807 | 1           |
| 100µM OV | MMP14  | 23.17624664 | 24.7636566 | -0.08513641 | 23.2613831 | 0.63670529  |
| H2O      | MMP14  |             |            |             |            |             |
| Average  |        |             | 24.848793  |             |            |             |

| Sample   | Target | Mean CT     | GAPDH CT   | Difference  | Corrected  | Fold Change |
|----------|--------|-------------|------------|-------------|------------|-------------|
| Ctrl     | MMP9   | 23.25020218 | 24.9339294 | 0.08513641  | 23.1650658 | 1           |
| 100µM OV | MMP9   | 24.57823944 | 24.7636566 | -0.08513641 | 24.6633759 | 0.35396777  |
| H2O      | MMP9   |             |            |             |            |             |
| Average  |        |             | 24.848793  |             |            |             |

Mean CT Values were corrected using the GAPDH Average of each qPCR

We calculated the relative values of the qPCR log function defining the ctrl as  $2^{(\text{Ctrl}-\text{Ctrl})}$

and the Fold change as  $2^{(\text{Ctrl}-\text{Treated})}$
